# Supplementary material for: Integrative visual omics of the white-rot fungus Polyporus brumalis exposes the biotechnological potential of its oxidative enzymes for delignifying raw plant biomass
Source: Biotechnol Biofuels. 2018 Jul 23;11:201. doi: 10.1186/s13068-018-1198-5 (PMC6055342; doi:10.1186/s13068-018-1198-5)
Supplement: Supplementary file 4 — Additional file 4: Dataset S2. Mean transcript read counts and numbers of proteins detected in the secretomes for each node of the Tatami map. [file 13068_2018_1198_MOESM4_ESM.xlsx]

## Sheet: Dataset S2
	mean transcript read count			Nb proteins detected in the secretome
nodeID	Day 4	Day 10	Day 15	Day 4	Day 10	Day 15
1	16.9857	12.3571	9.43071	0	1	1
2	13.872	13.3069	13.2781	5	7	7
3	13.7635	11.4616	10.4692	1	1	1
4	11.6899	10.4248	9.95173	0	1	1
5	12.1237	9.90303	9.35108	2	4	3
6	11.3783	10.0062	8.87218	0	0	0
7	13.5948	10.7859	9.43594	2	1	1
8	10.3236	9.53343	9.37854	3	2	2
9	10.1384	9.04485	8.71486	0	0	1
10	9.33352	8.88301	8.76739	0	0	0
11	11.7255	8.09173	7.40835	1	0	0
12	8.50848	7.32587	7.01349	0	0	0
13	8.9405	6.80963	4.92959	0	0	0
14	5.95505	6.33878	5.84643	0	0	0
15	4.81172	4.33246	4.63615	0	0	0
16	3.87831	3.68648	1.96852	0	0	0
17	3.93532	3.4307	4.03004	0	0	0
18	3.35061	1.95303	1.00469	0	0	0
19	2.14563	2.92402	2.71349	0	0	0
20	2.65103	2.17777	2.90047	0	0	0
21	1.21062	1.28016	1.38745	0	0	0
22	2.24996	2.18924	0.989301	0	0	0
23	0.843295	0.981136	0.987071	0	0	0
24	14.812	12.1849	11.3464	3	3	3
25	12.0212	12.0534	12.1383	0	1	2
26	14.9391	13.0448	11.8005	4	4	4
27	12.3401	10.9957	10.4177	1	2	1
28	10.6745	10.6511	10.635	0	0	0
29	12.6128	10.8135	10.209	2	3	3
30	10.0099	9.86689	9.78628	2	3	1
31	13.2525	11.9767	11.0133	3	3	3
32	9.54918	9.31396	9.19389	0	0	0
33	8.85553	9.07455	9.19364	0	0	0
34	9.38478	8.35704	7.87728	0	0	0
35	9.97363	8.28759	7.82258	0	0	0
36	8.95456	6.10076	7.41473	0	0	0
37	7.81699	6.8463	5.48844	0	0	0
38	6.04221	5.54507	5.38634	0	0	0
39	9.25126	4.58555	1.9416	0	0	0
40	4.58135	4.54814	4.65238	0	0	0
41	3.55029	3.03822	2.78551	0	0	0
42	3.94725	3.6328	3.18599	0	0	0
43	4.80747	3.22615	2.63859	0	0	0
44	3.48957	3.05164	2.30776	0	0	0
45	2.85141	1.32182	1.55407	0	0	0
46	1.55778	2.16852	1.77214	0	0	0
47	12.6094	12.9208	13.2023	2	5	5
48	12.2207	11.5738	11.2254	0	2	2
49	12.0851	11.1333	11.1732	0	1	0
50	10.6613	10.4936	10.3849	1	2	2
51	10.1363	10.2153	10.2888	0	1	1
52	10.3953	10.0422	9.8677	1	1	1
53	9.76676	9.60512	9.66193	0	0	0
54	9.76218	9.43448	9.30077	0	0	0
55	9.05253	9.3395	9.42882	0	0	0
56	9.15973	8.70369	8.53006	0	0	0
57	8.93156	8.18646	7.94323	0	0	0
58	8.43197	7.41329	6.98405	0	0	0
59	9.58707	6.96466	6.40027	1	1	1
60	7.53523	6.24014	6.11918	0	0	0
61	6.0723	6.08973	6.14094	0	0	0
62	3.63578	4.73235	5.58089	0	0	0
63	6.23505	4.79067	3.98005	0	0	0
64	5.06413	4.18472	3.73319	0	0	0
65	4.15483	3.85588	2.75535	0	0	0
66	2.43472	3.44648	3.34674	0	0	0
67	3.55054	2.33932	1.96348	0	0	0
68	1.91812	2.21508	3.043	0	0	0
69	2.75233	2.00067	2.1816	0	0	0
70	9.58649	12.9902	13.8406	0	0	1
71	11.1532	11.3648	11.535	0	1	1
72	9.97874	10.8503	11.2642	0	0	0
73	10.5219	10.8108	11.015	0	0	0
74	9.78686	10.4704	10.8668	0	1	1
75	9.75456	9.83016	9.94294	0	0	0
76	9.5308	9.50888	9.56754	0	1	1
77	9.77688	9.2704	9.01373	0	1	1
78	8.98777	9.23622	9.37507	0	1	1
79	9.71692	8.65134	8.3105	1	0	0
80	8.28565	8.06596	8.02936	0	0	0
81	9.16326	8.01794	7.2186	1	1	1
82	8.33446	7.30949	6.98758	0	0	0
83	8.04187	6.73434	6.2872	0	0	0
84	6.16816	6.20096	5.40586	0	0	0
85	4.97627	5.31576	5.12733	0	0	0
86	3.49632	4.35448	4.80938	0	0	0
87	6.08674	4.73718	4.1615	0	0	0
88	4.52987	4.27883	4.1343	0	0	0
89	2.52692	1.85075	3.15621	0	0	0
90	3.35725	3.82938	3.53536	0	0	0
91	3.24776	3.08783	3.44297	0	0	0
92	2.23714	2.21496	2.88166	0	0	0
93	10.2127	11.1834	11.7887	0	1	1
94	11.3301	11.2395	11.3058	2	0	1
95	11.4273	11.2489	11.1196	0	2	2
96	10.2959	10.3363	10.4586	0	1	1
97	10.1015	10.2877	10.3042	0	0	0
98	10.1777	10.0058	9.93281	0	1	1
99	10.8023	10.192	9.95478	0	0	0
100	10.777	9.204	8.35518	0	0	0
101	9.10594	8.8153	8.82762	0	0	0
102	8.98461	8.3401	8.02331	0	0	0
103	8.13494	7.97268	7.64491	1	1	1
104	8.03894	7.78934	7.42336	0	0	1
105	7.35502	7.11743	7.11846	0	0	0
106	7.11014	6.75952	6.70443	1	0	0
107	5.30898	5.83428	5.71501	0	0	0
108	5.17615	4.5994	4.61869	1	1	0
109	4.57924	3.96667	4.4951	0	0	0
110	3.46562	3.14351	3.54503	0	0	0
111	2.36278	2.66379	2.65539	0	0	0
112	3.66939	1.88436	3.04972	0	0	0
113	3.72933	2.47896	2.21814	0	0	0
114	0.932124	1.18201	2.34234	0	0	0
115	0.816977	2.76834	2.23118	0	0	0
116	12.1827	12.0158	11.8625	0	0	0
117	10.0262	11.6528	10.2807	0	0	0
118	10.8716	10.9663	11.0867	0	0	0
119	10.4747	10.6469	10.7892	0	1	0
120	10.7565	10.2724	10.0649	0	0	0
121	9.84546	10.1211	10.2876	0	0	0
122	10.4877	9.69018	9.3775	0	0	0
123	10.1242	9.692	9.52499	0	0	0
124	8.93359	9.15738	7.74847	0	0	0
125	8.3164	9.38125	8.21859	0	0	0
126	8.46351	8.57327	8.61287	0	0	0
127	6.84335	7.57107	7.50159	0	0	0
128	6.09186	6.60101	7.15638	0	0	0
129	7.32003	7.40508	6.77779	0	0	0
130	5.82707	4.97215	6.61752	0	0	0
131	5.15352	5.79654	5.87198	0	0	0
132	5.59078	5.12356	4.83918	0	0	0
133	4.47671	4.18351	4.80122	0	1	0
134	2.79145	3.12242	3.55944	0	0	0
135	3.38075	3.4228	3.70801	0	0	0
136	2.1549	2.76276	2.82143	0	0	0
137	2.27326	3.11258	2.79617	0	0	0
138	0.43252	4.27482	5.14431	0	0	0
139	11.7051	11.5386	11.4549	1	1	1
140	11.327	11.6012	11.7563	1	0	0
141	11.4467	10.891	10.5264	0	0	0
142	10.8576	10.6637	10.5176	1	1	1
143	9.81165	10.1082	10.2849	1	1	1
144	10.9035	10.1901	9.66325	0	0	0
145	10.8302	9.48649	9.2518	0	0	0
146	9.67458	9.35003	8.89099	0	0	0
147	7.90311	7.52013	7.28209	0	0	0
148	8.31808	8.60232	8.73442	0	1	0
149	7.37831	8.00781	8.14343	0	0	0
150	7.68524	7.57178	7.69544	0	0	0
151	6.44783	6.79511	6.28835	0	0	0
152	6.44575	6.07211	6.00597	0	0	0
153	5.75608	5.52004	5.70333	0	0	0
154	5.65361	6.08537	6.4529	0	0	0
155	3.81153	4.68409	5.27094	0	0	0
156	3.87977	4.26449	3.94441	0	0	0
157	2.60227	4.48514	4.86883	0	0	0
158	2.18013	4.34907	4.42975	0	0	0
159	0.97114	3.40783	3.97387	0	0	0
160	2.00727	3.97073	4.10856	0	0	0
161	1.85182	3.04764	3.64029	0	0	0
162	11.7828	11.8899	11.898	0	1	1
163	11.1718	12.7689	13.4882	1	1	1
164	12.8094	12.1189	11.8191	2	3	3
165	11.3342	11.032	10.8551	0	0	0
166	11.0018	11.0308	11.0553	0	0	0
167	11.4352	10.7326	10.4944	0	1	1
168	12.672	9.33219	8.28309	1	0	0
169	10.8195	9.35177	8.77896	1	1	1
170	8.60097	8.40945	7.99392	1	0	0
171	10.8646	7.14644	5.93487	0	0	0
172	6.30782	8.54147	5.59892	0	2	2
173	7.03148	6.82313	6.56908	0	0	0
174	6.47156	7.63815	7.4359	1	1	1
175	6.36607	7.04222	7.42598	0	1	0
176	4.14136	6.23837	7.42533	0	0	0
177	5.74099	6.56696	6.94161	0	0	0
178	5.12909	6.34943	6.62963	0	0	0
179	1.34402	6.05147	7.34334	0	0	0
180	3.05297	4.9136	5.82813	0	0	0
181	3.75614	5.00023	5.13192	0	0	0
182	2.57948	3.32045	3.52452	0	0	0
183	3.75764	3.70889	3.98611	0	0	0
184	3.78353	2.86192	2.92064	0	0	0
185	12.1149	12.4329	12.8464	0	3	3
186	12.3638	12.0489	12.0821	1	2	2
187	12.1255	11.3784	11.1241	1	2	2
188	12.4854	10.6388	10.2737	0	1	1
189	12.1507	11.6932	11.5191	0	1	1
190	12.0173	12.3523	9.04605	0	0	0
191	11.7308	10.1291	9.46202	0	0	0
192	8.96712	10.4436	7.90758	0	1	0
193	7.34429	8.46314	7.39065	0	0	0
194	7.59497	7.9694	8.34683	0	0	0
195	5.65822	8.7279	8.65144	0	1	1
196	7.18636	8.15965	9.20602	0	0	0
197	4.05055	7.75108	8.00869	0	0	0
198	6.00573	7.52721	8.38413	0	0	0
199	5.46099	6.72812	7.66279	0	0	0
200	4.68513	6.44943	7.5834	0	0	0
201	2.76122	4.12697	5.0104	0	0	0
202	3.37603	4.4097	4.97328	0	0	0
203	4.70677	5.61339	6.07826	0	0	0
204	3.65009	4.19264	4.05849	0	0	0
205	3.95816	4.18548	4.82722	0	0	0
206	3.36363	3.06701	2.80487	0	0	0
207	3.57913	3.30456	2.35724	0	0	0
208	11.2445	12.002	12.4726	0	0	0
209	13.1313	13.4389	13.5429	4	6	7
210	13.2261	11.7437	11.334	0	0	0
211	10.975	11.3411	11.6301	0	0	0
212	12.019	10.7032	9.98776	1	1	1
213	10.9166	10.3568	10.2496	1	1	0
214	10.3481	9.92953	9.6803	0	0	0
215	9.30647	9.91527	9.57649	0	0	0
216	7.71804	8.69918	8.99491	0	0	0
217	8.08207	9.27716	9.76002	0	0	0
218	5.99766	10.7526	9.21698	0	1	1
219	6.29066	9.81342	10.7291	0	0	0
220	4.53055	9.06973	10.0837	0	0	0
221	6.28	8.23935	9.22428	0	0	0
222	4.58618	7.36859	8.41984	0	0	0
223	6.02236	7.14465	7.75055	0	0	0
224	5.24325	6.77596	6.59686	0	0	0
225	3.76106	5.31863	5.7621	0	0	0
226	3.52712	5.01841	5.52021	0	0	0
227	3.49191	6.04895	6.86831	0	0	0
228	4.48678	5.14412	4.71211	0	0	0
229	4.78511	4.95595	4.95627	0	0	1
230	4.90119	3.56261	3.12192	0	0	0
231	12.3366	12.3889	12.4208	0	2	2
232	13.5346	12.5953	12.4092	1	7	6
233	9.32691	13.0003	13.5571	0	2	2
234	9.8879	12.1177	10.1946	1	2	2
235	11.2031	11.9907	12.244	0	0	0
236	11.6863	11.3317	11.1151	0	1	1
237	9.58907	9.58458	9.51072	0	0	0
238	9.57977	9.72049	9.84155	0	0	0
239	9.24281	9.16833	8.63146	0	0	0
240	8.82793	9.46163	9.91276	0	0	0
241	8.27699	9.46061	10.1244	0	0	0
242	6.8217	8.61887	9.63254	0	0	0
243	7.40068	8.22891	8.39318	0	0	0
244	7.60617	9.41911	9.87731	0	0	0
245	6.54976	8.0263	9.2699	0	0	0
246	5.528	7.49111	8.5063	0	0	0
247	6.59039	6.99367	7.02826	0	0	0
248	5.40082	6.21299	6.75734	0	0	0
249	5.48586	5.77986	5.81709	0	0	0
250	5.19527	4.15494	3.60094	0	0	0
251	6.27637	5.04074	4.70882	0	0	0
252	4.32373	4.20148	4.07496	0	0	0
253	3.1571	3.58491	3.97651	0	0	0
254	11.9061	12.7383	13.129	0	2	2
255	12.4407	11.9819	11.6995	1	5	5
256	11.0489	11.3787	10.9693	1	1	1
257	12.6194	11.4112	10.7182	1	1	1
258	11.2349	9.96173	8.78487	0	0	0
259	10.7792	10.8453	10.545	2	2	1
260	8.69659	10.6677	10.9123	0	0	0
261	11.1151	10.862	10.7505	0	1	1
262	8.8879	8.9644	8.64448	0	0	0
263	9.4139	9.10095	8.97177	0	0	0
264	7.35891	9.7077	9.84657	0	0	0
265	8.30709	9.03651	9.39522	0	0	0
266	7.35705	9.6111	8.75677	0	0	0
267	8.86519	8.75082	8.63386	0	1	1
268	6.35134	8.05606	8.39283	0	0	0
269	7.66779	8.60329	8.75407	0	0	0
270	6.70849	7.17421	7.37004	0	0	0
271	7.81832	6.99191	6.86521	0	0	0
272	7.5773	5.95373	5.50238	0	0	0
273	6.19874	5.88682	5.87577	0	0	0
274	5.77546	5.48606	5.17357	0	0	0
275	5.50906	4.62774	4.99504	0	0	0
276	4.17486	3.75015	3.51676	0	0	0
277	13.6483	12.5226	12.1195	1	3	2
278	13.0318	11.8618	11.1446	2	2	2
279	12.9416	11.8526	10.8187	0	1	1
280	8.3558	10.7745	10.0511	0	0	0
281	7.15331	11.8592	12.3064	0	1	0
282	9.72068	10.5412	11.0885	0	1	1
283	8.99851	9.89796	10.5189	0	1	1
284	9.33932	9.96666	10.3537	0	0	0
285	9.4357	9.62802	9.7487	0	0	0
286	9.12918	9.21413	9.308	0	0	0
287	8.73644	8.87464	9.00001	0	0	0
288	8.22101	9.08501	9.55115	0	0	0
289	8.53627	8.73137	8.75322	0	0	0
290	8.78686	8.50169	8.42187	0	0	0
291	8.11442	7.86995	7.84707	0	0	0
292	8.77977	7.91967	7.09643	0	0	0
293	7.69231	7.69216	7.73298	0	0	0
294	6.16753	5.8098	5.65019	0	0	0
295	5.50279	5.76543	5.72817	0	0	0
296	4.03709	3.90926	4.44379	0	0	0
297	4.49001	5.32103	5.84393	0	0	0
298	3.39821	3.9452	4.1781	0	0	0
299	0.799816	2.6127	2.95219	0	0	0
300	15.5789	13.6116	12.328	2	3	3
301	12.9501	12.7478	12.4754	2	4	3
302	12.1718	12.1485	12.1212	1	3	3
303	10.0355	14.4786	15.5242	2	5	5
304	7.28303	13.1945	14.1455	0	2	2
305	10.2689	10.9859	11.498	0	0	0
306	8.6655	10.9497	11.6962	0	0	0
307	9.46318	9.88666	10.2308	0	0	0
308	11.0711	10.2958	10.0152	2	2	2
309	8.95031	9.36453	10.0368	0	0	0
310	8.89557	9.60688	9.98739	0	0	0
311	8.17857	8.50044	8.62208	0	0	0
312	7.7337	8.48583	8.94875	0	0	0
313	8.08447	8.1923	8.25305	0	0	0
314	7.43996	7.65772	7.59038	0	0	0
315	6.74812	8.24996	6.91345	0	0	0
316	4.85305	5.71507	5.60559	0	0	0
317	6.44791	6.47117	6.40107	0	0	0
318	6.86482	6.62056	6.57488	0	0	0
319	5.70139	6.01862	6.35469	0	0	0
320	5.32719	5.32768	5.83873	0	0	0
321	4.82508	4.60324	4.38635	0	0	0
322	3.80724	3.40178	3.5968	0	0	0
323	13.2026	12.9005	12.5948	2	5	5
324	13.103	13.3653	13.0341	0	3	3
325	13.8235	13.2708	13.1638	2	7	6
326	12.8032	13.2939	13.4005	0	3	2
327	10.2729	11.5759	12.2793	0	1	1
328	7.05779	10.8783	12.5832	0	0	0
329	9.54936	10.7776	11.2554	0	0	0
330	8.33862	9.96863	11.1225	0	0	0
331	9.59362	10.5056	9.60446	0	0	1
332	8.40158	10.9194	9.48938	0	0	0
333	7.91549	8.94451	9.30472	0	0	0
334	8.63588	8.7235	8.87129	0	0	0
335	7.32296	8.30513	8.68887	0	0	0
336	7.36671	8.12866	8.5063	0	0	0
337	7.26932	7.83124	8.19633	1	0	0
338	6.54244	7.4908	7.83508	0	0	0
339	7.00352	7.28535	7.69326	0	0	0
340	6.50312	6.77576	6.9721	0	0	0
341	5.82596	6.55868	7.0368	0	0	0
342	5.97487	6.27429	6.25874	0	0	0
343	4.60942	5.87642	6.30387	0	0	0
344	3.95733	5.01922	4.96811	0	0	0
345	4.93275	4.83416	4.37886	0	0	0
346	15.7017	13.9732	13.046	2	7	5
347	13.6283	14.2007	14.3988	3	9	8
348	13.8033	13.497	13.3312	3	7	5
349	12.609	12.9858	13.219	2	2	3
350	10.7392	12.7906	13.609	0	1	1
351	7.87236	12.9036	13.9057	0	1	1
352	8.68513	11.7595	12.5691	1	1	1
353	6.43703	11.2663	12.8105	0	0	1
354	7.53162	9.51136	10.7025	0	0	0
355	9.28893	9.71712	10.292	0	0	0
356	9.32862	9.2793	9.2986	0	0	0
357	8.83357	8.51309	8.43965	0	0	0
358	8.2492	8.35967	8.34227	0	0	0
359	7.94738	8.53203	8.82276	1	1	1
360	6.79659	7.74275	8.1403	0	0	1
361	6.98246	7.48093	7.70682	0	0	0
362	6.10679	6.63624	6.77575	0	0	0
363	6.70042	7.05245	7.14871	0	0	0
364	5.6795	5.92416	6.15079	0	0	0
365	3.99155	5.30587	4.18798	0	0	0
366	4.93905	5.08683	5.2638	0	0	0
367	3.21774	5.63523	6.19223	0	0	0
368	4.29191	5.30784	5.71212	0	0	0
369	13.4814	15.5887	15.911	1	4	4
370	8.67462	16.019	16.7471	3	3	3
371	12.901	14.0993	14.3833	2	3	3
372	15.6947	14.7894	13.9875	5	6	6
373	14.4393	14.3229	14.394	2	5	5
374	10.9025	12.1541	12.6042	0	0	0
375	10.6712	11.8364	12.3287	0	2	2
376	8.42199	10.7961	11.2996	0	0	0
377	9.16811	9.70651	10.0771	0	0	0
378	10.3824	10.7077	11.1083	0	1	1
379	9.23123	8.80528	8.61318	0	0	0
380	8.5098	7.84728	7.62768	0	0	0
381	7.76193	8.59706	7.72993	0	0	0
382	7.66852	7.79049	7.90796	0	0	0
383	7.09662	7.17508	7.24707	0	0	0
384	7.29935	6.9733	6.86648	0	0	0
385	6.34537	7.08878	6.52055	0	0	0
386	6.52535	6.57163	6.6953	0	0	0
387	6.49125	6.44736	5.7923	0	0	0
388	6.49585	6.29266	6.39305	0	0	0
389	5.95576	5.24118	5.42028	0	0	0
390	4.3107	4.68513	4.90628	0	0	0
391	4.22322	4.2824	4.19517	0	0	0
392	15.4586	15.9254	15.9155	3	6	5
393	14.7022	14.9486	14.9693	3	12	11
394	15.4093	14.1454	13.8094	5	10	10
395	13.0955	14.8798	15.326	2	7	8
396	14.1887	13.282	13.0793	3	8	8
397	11.9628	13.8005	14.0807	1	7	7
398	11.0221	13.0318	13.7005	2	3	4
399	11.2908	11.7206	12.1951	0	0	0
400	15.4031	10.169	7.40713	2	1	1
401	10.8585	9.46582	9.03454	2	1	1
402	10.148	8.45965	8.01901	0	0	0
403	10.3128	8.67976	8.32985	0	0	0
404	8.78479	8.32573	8.19237	0	0	0
405	7.92251	8.04099	8.12309	0	0	0
406	7.58222	7.39234	7.24299	0	0	0
407	7.29007	7.10397	7.00311	0	0	0
408	7.8266	7.12751	6.89623	0	0	0
409	7.13454	6.69049	6.43715	0	0	0
410	6.88034	6.54045	6.17151	0	0	0
411	5.17841	5.17126	5.31157	0	0	0
412	5.13313	4.78438	4.7474	0	0	0
413	4.82476	5.27409	5.15101	0	0	0
414	5.90337	5.38818	4.90111	0	0	0
415	15.3162	17.1172	17.6416	0	1	1
416	16.2699	15.841	15.5214	0	6	5
417	17.0179	16.1319	15.1163	3	6	6
418	16.1431	17.3596	16.9954	3	4	4
419	18.471	14.8815	11.2439	2	1	1
420	13.151	14.9301	15.4705	3	4	4
421	14.0262	12.7373	11.1384	0	1	1
422	16.3202	12.6228	8.34759	0	1	1
423	11.5394	9.79627	8.48337	0	0	0
424	12.0517	8.93243	7.97675	0	0	0
425	11.9467	7.47072	6.35231	0	0	0
426	10.9498	7.93335	7.34833	1	1	1
427	9.30289	7.72644	7.44772	0	0	0
428	8.23448	7.91672	7.7128	2	0	0
429	7.81986	7.44927	7.43675	0	0	0
430	8.36276	7.53049	7.20148	1	0	0
431	8.38311	7.0658	6.50277	0	0	0
432	10.1145	7.48273	6.31055	1	1	0
433	7.44974	6.26996	5.88246	0	0	0
434	7.47684	5.83596	5.30273	0	0	0
435	6.85906	6.1027	6.05519	0	0	0
436	6.30376	5.82444	5.54813	0	0	0
437	6.81811	5.53535	4.95534	0	0	0
